# Supplementary figures and images for: Mechanism of magnetization reduction in iron oxide nanoparticles
Source: Royal Society of Chemistry journal article supplement (doi:10.1039/d0nr08615k), 2021-01-01

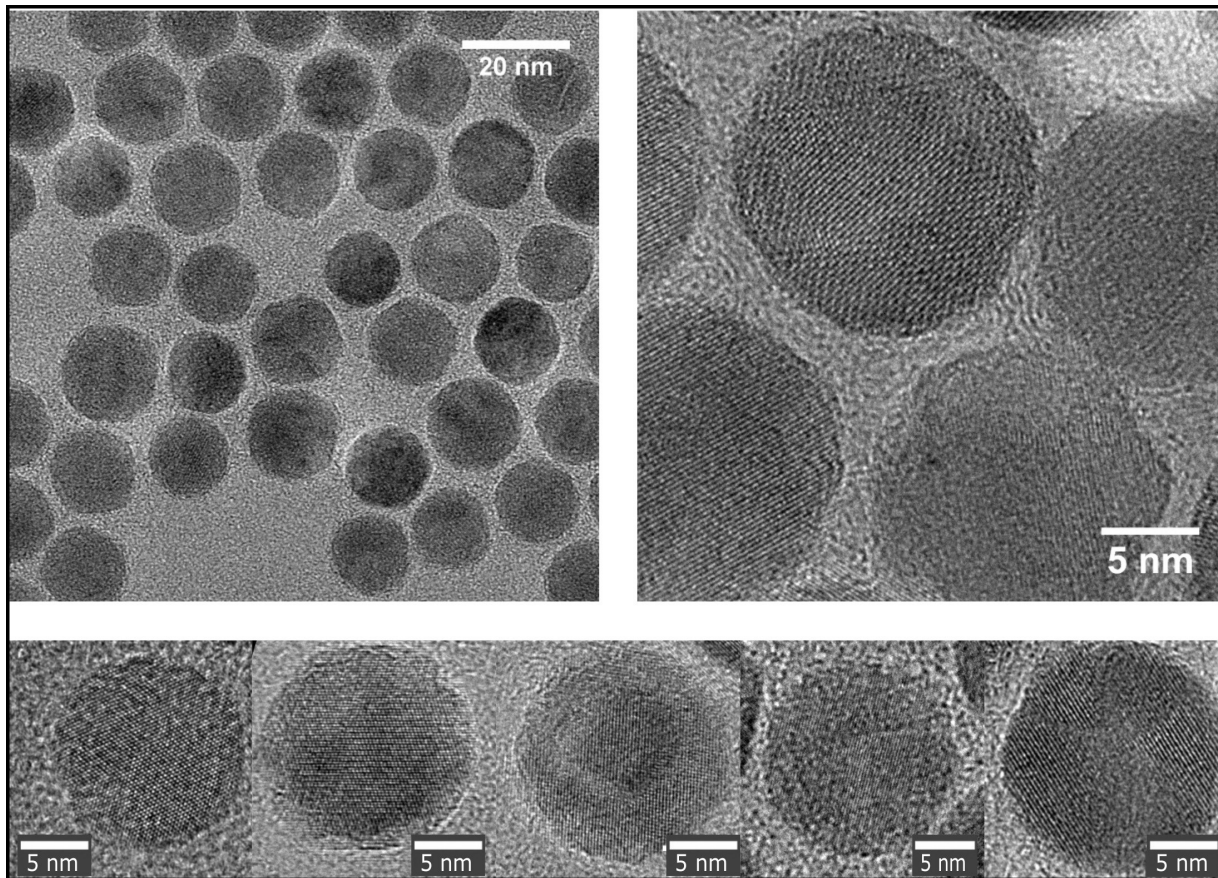

Supplement: d0nr08615k3.pdf [file d0nr08615k3.pdf]

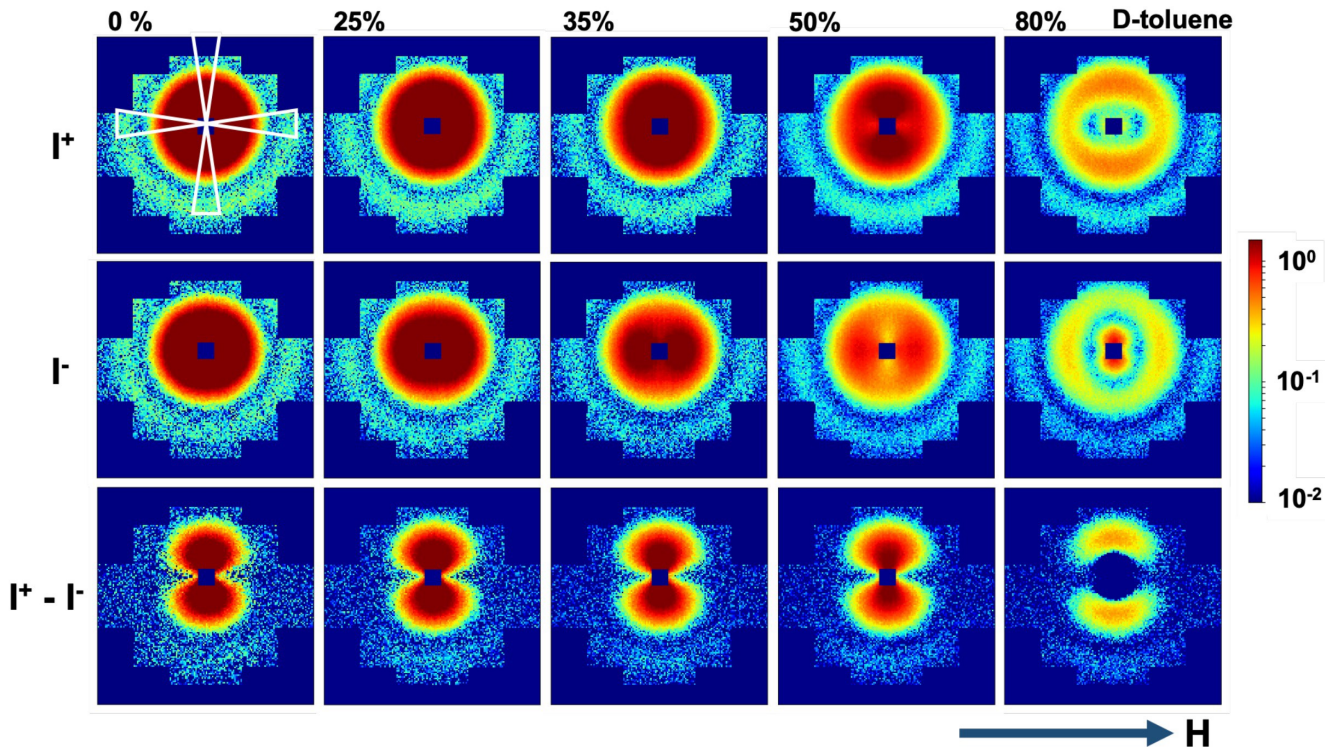

Supplement: d0nr08615k4.pdf [file d0nr08615k4.pdf]

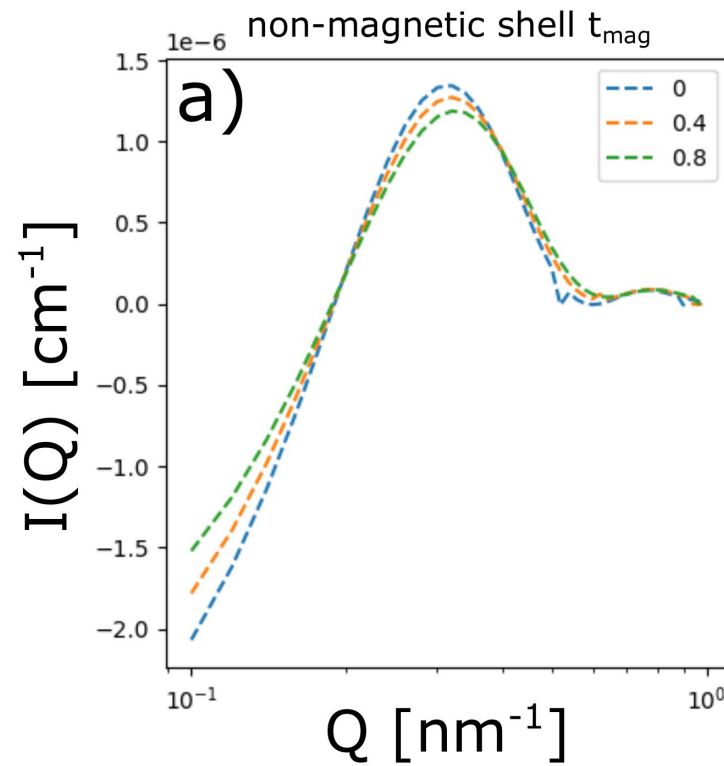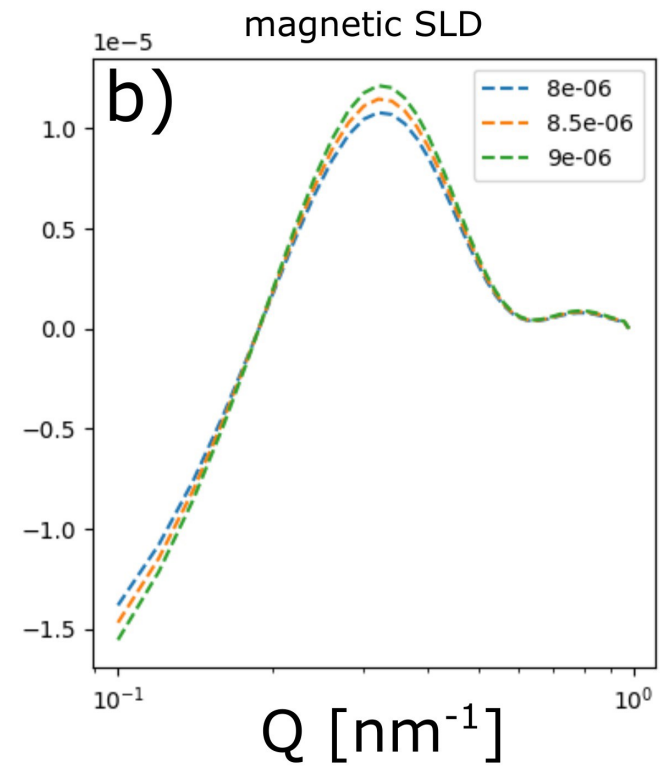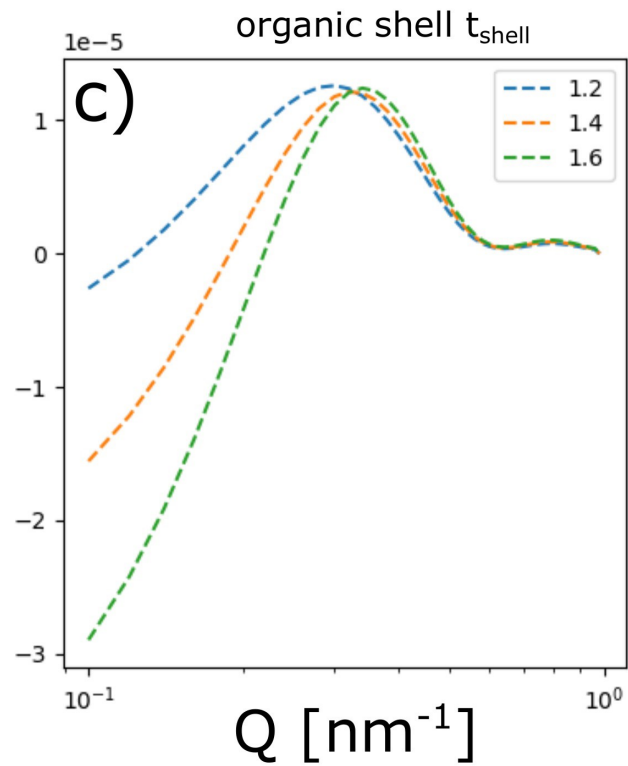

Supplement: d0nr08615k6.pdf [file d0nr08615k6.pdf]

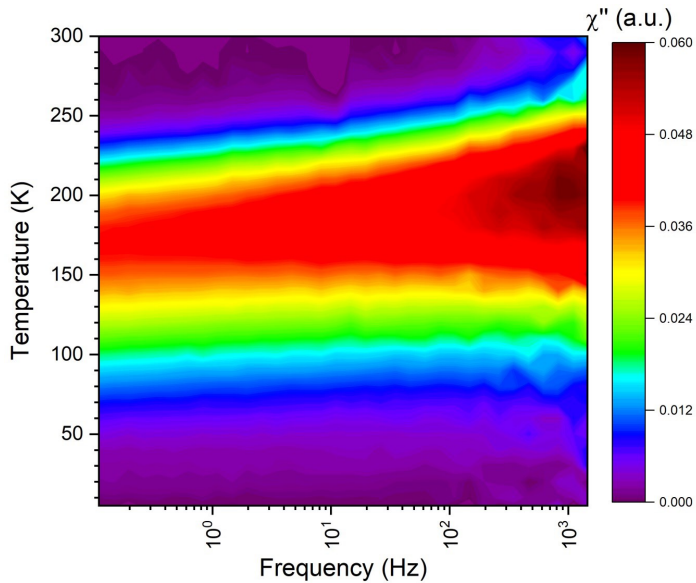

Supplement: d0nr08615k7.pdf [file d0nr08615k7.pdf]
